# Supplementary material for: Hierarchically structured superhydrophobic flowers with low hysteresis of the wild pansy (Viola tricolor) – new design principles for biomimetic materials
Source: publisher site journal article supplement (doi:10.3762/bjnano.2.27), 2011-05-04
Supplement: Additional file 1 [file 2190-4286-2-27-S1.pdf]

# Supporting Information

for

## Hierarchically structured superhydrophobic flowers with low hysteresis of the wild pansy (*Viola tricolor*) – new design principles for biomimetic materials

Anna J. Schulte<sup>\*1</sup>, Damian M. Droste<sup>1</sup>, Kerstin Koch<sup>2</sup> and Wilhelm Barthlott<sup>1</sup>

<sup>1</sup>Nees Institute for Biodiversity of Plants, University of Bonn, Meckenheimer Allee 170, Bonn, Germany and <sup>2</sup>Rhine-Waal University of Applied Sciences, Landwehr 4, Kleve, Germany

Email: Anna Julia Schulte - [a.schulte@uni-bonn.de](mailto:a.schulte@uni-bonn.de)

<sup>\*</sup>Corresponding author

### Additional figures

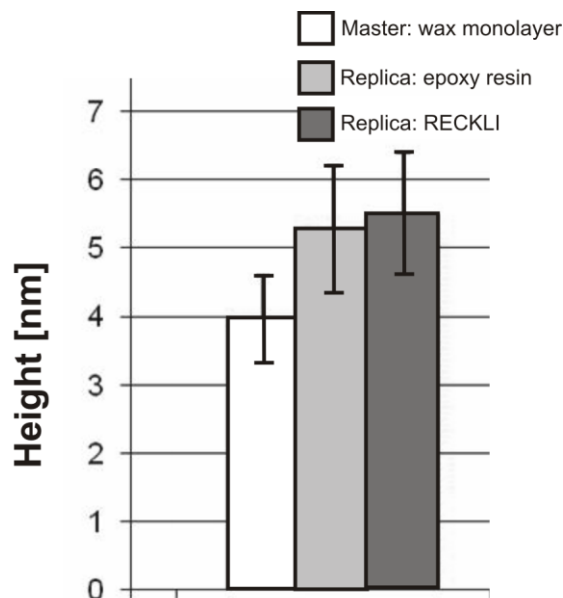

**Figure S1:** Replication of an octacosanol wax crystal multilayer with steps of 4 nm height. – Moulding performance of the replication material RECKLI compared to the replication performance of epoxy resin used in Koch et al. 2008 [1]. Measurements were performed by atomic force microscopy ( $n = 10$ ).

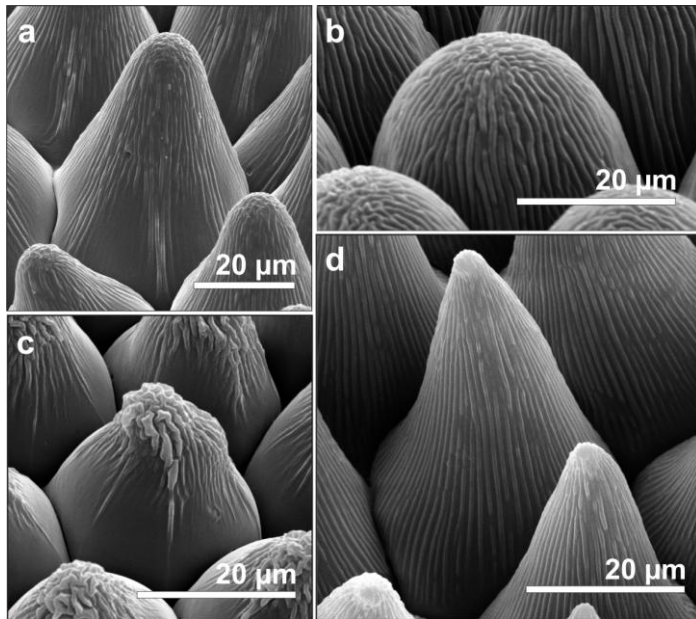

**Figure S2:** SEM micrographs of single epidermal cells and their cuticular folding on top: (a) *Cosmos*, (b) *Dahlia*, (c) *Rosa* and (d) *Viola*.

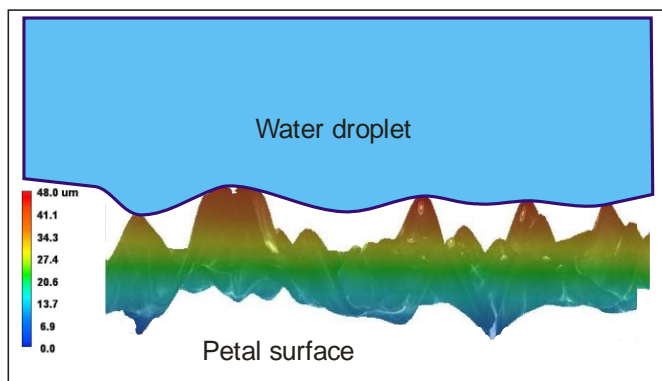

**Figure S3:** Schematic of the proposed wetting state of a water droplet on a 3d microscopy scan of the surface of a *Viola* petal (Cassie-Baxter state) when a water droplet is in contact with the surface of a *Viola* petal.

## References

1. Koch, K.; Dommissse, A.; Barthlott, W.; Gorb, S. N. *Acta Biomater.* **2007**, *3*, 905–909. doi:[10.1016/j.actbio.2007.05.013](https://doi.org/10.1016/j.actbio.2007.05.013)
